# Supplementary material for: Assessment of Functional Activities in Individuals with Parkinson’s Disease Using a Simple and Reliable Smartphone-Based Procedure
Source: PubMed Central journal article supplement (PMC7312659; doi:10.3390/ijerph17114123), 2020-06-09
Supplement: ijerph-17-04123-s001.pdf [file ijerph-17-04123-s001.pdf]

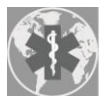

**Table 1.** Specific results for the Levene test and the Independent t-test.

| Variable         | Levene test<br>(Assumption Met when $p > 0.05$ ) |         | Situation Regarding the<br>Homoscedasticity | Independent t-test |                       |             |                    |                                     |
|------------------|--------------------------------------------------|---------|---------------------------------------------|--------------------|-----------------------|-------------|--------------------|-------------------------------------|
|                  | F                                                | p-value |                                             | t                  | Degrees of<br>freedom | p-<br>value | Mean<br>difference | Standard error of the<br>difference |
| MLDispl          | 0.156                                            | 0.694   | Similar variance assumption                 | -2.329             | 58                    | 0.023       | -2.93152           | 1.25865                             |
|                  |                                                  |         | No Similar variance assumption              | -2.321             | 56.282                | 0.024       | -2.93152           | 1.26324                             |
| APDispl          | 10.126                                           | 0.002   | Similar variance assumption                 | -3.802             | 58                    | 0.000       | -10.03122          | 2.63820                             |
|                  |                                                  |         | No Similar variance assumption              | -3.723             | 39.733                | 0.001       | -10.03122          | 2.69457                             |
| Vrange           | 2.557                                            | 0.115   | Similar variance assumption                 | -1.584             | 58                    | 0.119       | -2.46679           | 1.55691                             |
|                  |                                                  |         | No Similar variance assumption              | -1.560             | 45.966                | 0.126       | -2.46679           | 1.58089                             |
| MLrange          | 3.862                                            | 0.054   | Similar variance assumption                 | 2.084              | 58                    | 0.042       | 11.81907           | 5.67070                             |
|                  |                                                  |         | No Similar variance assumption              | 2.112              | 52.358                | 0.039       | 11.81907           | 5.59599                             |
| PStand           | 0.098                                            | 0.755   | Similar variance assumption                 | 0.256              | 58                    | 0.799       | 4.40433            | 17.20681                            |
|                  |                                                  |         | No Similar variance assumption              | 0.256              | 57.843                | 0.799       | 4.40433            | 17.19765                            |
| TTurnSit         | 5.392                                            | 0.024   | Similar variance assumption                 | -2.869             | 58                    | 0.006       | -1.04506           | 0.36425                             |
|                  |                                                  |         | No Similar variance assumption              | -2.821             | 44.237                | 0.007       | -1.04506           | 0.37046                             |
| Reaction<br>time | 0.147                                            | 0.703   | Similar variance assumption                 | -0.333             | 58                    | 0.740       | -0.03191           | 0.09583                             |
|                  |                                                  |         | No Similar variance assumption              | -0.332             | 56.802                | 0.741       | -0.03191           | 0.09608                             |
| Total time       | 0.000                                            | 0.992   | Similar variance assumption                 | -0.060             | 58                    | 0.953       | -0.04558           | 0.76299                             |
|                  |                                                  |         | No Similar variance assumption              | -0.060             | 57.127                | 0.953       | -0.04558           | 0.76443                             |

Medial-lateral displacement (MLDisp). anterior-posterior displacement (APDisp). vertical range (Vrange). medial-lateral range (MLrange). Turn-to-sit time (TTurnSit). Sit-to-stand power (PStand).
